# Supplementary material for: Mitochondrial Markers for the Detection of Duck Breeds Using Polymerase Chain Reaction
Source: MDPI journal article supplement (doi:10.3390/genes12060857), 2021-06-03
Supplement: s1 [file s1]

**Table 1.** Sequences of primers used to determine part of mtDNA for the Rouen duck.

| Primer Pair                                                          | Mtdna Region | Amplicon Length                                          | Annealing Temp  |
|----------------------------------------------------------------------|--------------|----------------------------------------------------------|-----------------|
| F1: TCCAGCAC-<br>TAAAGACGATCC<br>R1:<br>CCCATTCTTCCGTC<br>CCATA      | NC_009684.1  | D-loop <966..1049<br>tRNA 1050..1119<br>rRNA 1120..1870> | 905 bp<br>52 °C |
|                                                                      | EU755254.1   | No PCR product                                           | -<br>56 °C      |
| F2: AGATGCAC-<br>CTAAACACACCA<br>R2: TAAGTAGCTCGC<br>TTGGGTTT        | NC_009684.1  | rRNA<1494..2104<br>tRNA 2105..2175<br>rRNA 2176..2451>   | 958 bp<br>56 °C |
|                                                                      | EU755254.1   | rRNA<1491..2102<br>tRNA 2103..2174<br>rRNA 2175..2449>   | 959 bp<br>59 °C |
| F3: ACCCAAAGCAC-<br>TCAGCTT<br>R3: TACTGGTCTC-<br>TATCGCGTCT         | NC_009684.1  | tRNA<2122..2173<br>rRNA 2174..2305                       | 184 bp          |
|                                                                      | EU755254.1   | tRNA<2120..2174<br>rRNA 2175..2304                       | 185 bp          |
| F4: CACCCCCACATA<br>ACTAATACCC<br>R4: AGTTT-<br>GGGTCATTGAG-<br>TGGG | NC_009684.1  | No PCR product                                           | -               |
|                                                                      | EU755254.1   | rRNA<2018..2102<br>tRNA 2103..2174<br>rRNA 2175..2241>   | 224 bp          |
| Obtained sequence                                                    |              | <487–713>                                                | 227 bp          |

**Table 2.** Parameters of the regression curves.

| Primers 1 |                                   |                                |                |         |       |                            |         |        |       |
|-----------|-----------------------------------|--------------------------------|----------------|---------|-------|----------------------------|---------|--------|-------|
| Sample    | Coefficients of simple regression |                                |                |         |       | Quantity of DNA mixture of |         |        |       |
|           | slope                             | C <sub>T</sub> -Inter-<br>cept | R <sup>2</sup> | Eff [%] | LOD   | birds                      | mammals | plants | water |
| 1         | -3.337                            | 25.031                         | 0.983          | 100.694 | 0.025 | 0.00                       | 0.00    | 0.00   | 0.00  |
| 2         | -3.224                            | 25.078                         | 0.980          | 104.265 | 0.028 | 0.00                       | 0.00    | 0.00   | 0.00  |
| 3         | -3.222                            | 26.154                         | 0.998          | 104.346 | 0.024 | 0.00                       | 0.00    | 0.00   | 0.00  |
| Primers 2 |                                   |                                |                |         |       |                            |         |        |       |
| Sample    | Coefficients of Simple Regression |                                |                |         |       | Quantity of DNA mixture of |         |        |       |
|           | slope                             | C <sub>T</sub> -Inter-<br>cept | R <sup>2</sup> | Eff [%] | LOD   | birds                      | mammals | plants | water |
| 1         | -3.273                            | 26.406                         | 0.988          | 102.066 | 0.024 | 0.00                       | 0.00    | 0.00   | 0.00  |
| 2         | -3.525                            | 26.119                         | 0.980          | 92.185  | 0.024 | 0.00                       | 0.00    | 0.00   | 0.00  |
| 3         | -3.367                            | 26.710                         | 1.000          | 98.153  | 0.005 | 0.00                       | 0.00    | 0.00   | 0.00  |

Slope-regression coefficient: In the standard curve, the value of CT where the regression line crosses the CT-axis – CT-intercept, Regression coefficient – R<sup>2</sup>, amplification efficiency – EFF, limit of detection – LOD. Quantity of DNA of plants and other groups of animals determined by the standard curve (cross-reactions) - Quantity of DNA mixture.

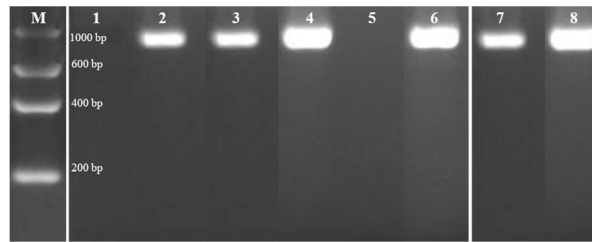

**Figure S1.** PCR result for analysed primers F1/R1, F2/R2. Results of PCR reaction of first (wells 1–3, 7) and second primer pair (wells 4–6, 8). Lanes 1 and 5 – negative PCR control, lanes 2 and 4 – products for English selection Rouen's meat, lanes 3 and 6 – products for English selection Rouen's feathers, lanes 7 and 8 – positive PCR control. M-200 -1000 bp step ladder.

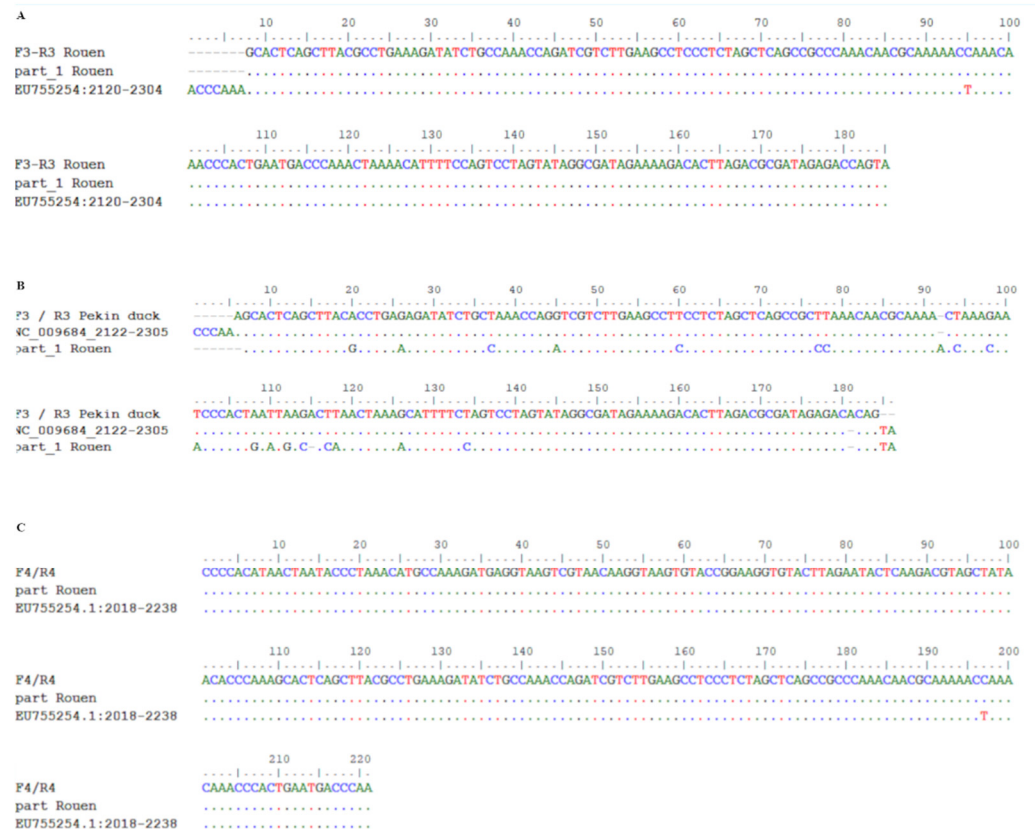

**Figure S2.** Multi alignment obtained sequences by using third and fourth primers pair. Result of alignment: **A:** sequences flanked by using third pair of primers; obtained sequences of Rouen duck (F3-R3 Rouen), part of identified by us sequence of Rouen duck (part\_1 Rouen), *Cairina moschata* (EU755254:2120-2304); **B:** sequences flanked by using third pair of primers; obtained sequences of Pekin duck (F3/R3 Pekin duck), part of identified by us sequence of Rouen duck (part\_1 Rouen), *Anas platyrhynchos* (NC\_009684\_2122-2305); **C:** sequences flanked by using forth pair of primers; obtained sequences of Rouen duck (F4-R4), part of identified by us sequence of Rouen duck (part Rouen), *Cairina moschata* (EU755254:2018-2238).
